# Supplementary material
Source: PubMed Central journal article supplement (PMC3694808)
Supplement: NIHMS259878-supplement-Table_S2.pdf [file NIHMS259878-supplement-Table_S2.pdf]

**Supplementary Table S2.** Genes differentially regulated between WMH+ subjects and WMH- subjects.

| Probe Set ID | Representative Public ID | Gene Symbol | Gene Title                                                       | Fold-Change (WMH+ vs WMH-) | Entrez Gene ID | UniGene ID | p-value  | FDR-corrected Q-value |
|--------------|--------------------------|-------------|------------------------------------------------------------------|----------------------------|----------------|------------|----------|-----------------------|
| 231455_at    | AA768888                 | FLJ42418    | FLJ42418 protein                                                 | 3.1                        | 400941         | Hs.446195  | 8.39E-04 | 6.80E-01              |
| 202411_at    | NM_005532                | IFI27       | interferon, alpha-inducible protein 27                           | 2.4                        | 3429           | Hs.532634  | 2.89E-03 | 7.12E-01              |
| 205230_at    | NM_014954                | RPH3A       | rabphilin 3A homolog (mouse)                                     | 2.2                        | 22895          | Hs.21239   | 6.06E-04 | 6.22E-01              |
| 228936_at    | AW073444                 | ---         | ---                                                              | 2.0                        | ---            | Hs.217079  | 1.44E-03 | 6.96E-01              |
| 226084_at    | AA554833                 | MAP1B       | microtubule-associated protein 1B                                | 1.9                        | 4131           | Hs.335079  | 3.43E-03 | 7.12E-01              |
| 242267_x_at  | T68304                   | ---         | ---                                                              | 1.9                        | ---            | Hs.504422  | 9.04E-04 | 6.80E-01              |
| 1552946_at   | NM_153608                | ZNF114      | zinc finger protein 114                                          | 1.7                        | 163071         | Hs.511883  | 4.76E-03 | 7.13E-01              |
| 1561492_at   | BC027488                 | LOC647107   | hypothetical protein LOC647107                                   | 1.7                        | 647107         | ---        | 1.99E-03 | 6.99E-01              |
| 1563467_at   | AL833266                 | ---         | ---                                                              | 1.7                        | ---            | Hs.683994  | 4.80E-04 | 6.22E-01              |
| 1570213_at   | BC037822                 | ---         | ---                                                              | 1.7                        | ---            | Hs.621670  | 2.25E-03 | 6.99E-01              |
| 203661_s_at  | BC002660                 | TMOD1       | tropomodulin 1                                                   | 1.7                        | 7111           | Hs.494595  | 4.27E-03 | 7.13E-01              |
| 204149_s_at  | NM_000850                | GSTM4       | glutathione S-transferase mu 4                                   | 1.7                        | 2948           | Hs.348387  | 3.50E-03 | 7.12E-01              |
| 215736_at    | AF035317                 | ---         | ---                                                              | 1.7                        | ---            | ---        | 4.55E-03 | 7.13E-01              |
| 222322_at    | AI791860                 | ---         | ---                                                              | 1.7                        | ---            | Hs.661379  | 1.02E-03 | 6.80E-01              |
| 230695_s_at  | AL136131                 | RSPH9       | radial spoke head 9 homolog (Chlamydomonas)                      | 1.7                        | 221421         | Hs.534585  | 4.66E-03 | 7.13E-01              |
| 1556331_a_at | BC035063                 | ---         | ---                                                              | 1.6                        | ---            | Hs.658896  | 3.24E-03 | 7.12E-01              |
| 1557137_at   | AA084725                 | TMEM17      | transmembrane protein 17                                         | 1.6                        | 200728         | Hs.308028  | 1.08E-03 | 6.80E-01              |
| 1558226_a_at | BC041979                 | ---         | ---                                                              | 1.6                        | ---            | Hs.254117  | 9.64E-04 | 6.80E-01              |
| 1569191_at   | BC016785                 | ZNF826      | zinc finger protein 826                                          | 1.6                        | 664701         | Hs.631635  | 5.29E-04 | 6.22E-01              |
| 205445_at    | NM_000948                | PRL         | prolactin                                                        | 1.6                        | 5617           | Hs.1905    | 1.21E-04 | 5.38E-01              |
| 206318_at    | NM_020398                | SPINLW1     | serine peptidase inhibitor-like, with Kunitz and WAP domains 1 ( | 1.6                        | 57119          | Hs.121084  | 4.62E-03 | 7.13E-01              |
| 211560_s_at  | AF130113                 | ALAS2       | aminolevulinate, delta-, synthase 2                              | 1.6                        | 212            | Hs.522666  | 1.28E-03 | 6.96E-01              |
| 214607_at    | AW085556                 | PAK3        | p21 protein (Cdc42/Rac)-activated kinase 3                       | 1.6                        | 5063           | Hs.656789  | 3.41E-03 | 7.12E-01              |
| 218974_at    | NM_018013                | SOBP        | sine oculis binding protein homolog (Drosophila)                 | 1.6                        | 55084          | Hs.445244  | 4.72E-03 | 7.13E-01              |
| 224690_at    | BG432350                 | C20orf108   | chromosome 20 open reading frame 108                             | 1.6                        | 116151         | Hs.143736  | 3.34E-03 | 7.12E-01              |
| 234064_at    | AK024900                 | ---         | ---                                                              | 1.6                        | ---            | Hs.612889  | 4.85E-03 | 7.13E-01              |
| 238178_at    | BF110268                 | ---         | ---                                                              | 1.6                        | ---            | Hs.559668  | 9.74E-04 | 6.80E-01              |
| 240159_at    | AA836116                 | SLC15A2     | solute carrier family 15 (H+/peptide transporter), member 2      | 1.6                        | 6565           | Hs.518089  | 3.00E-03 | 7.12E-01              |
| 243586_at    | AA707317                 | ---         | ---                                                              | 1.6                        | ---            | Hs.682859  | 3.05E-03 | 7.12E-01              |
| 1553607_at   | NM_138968                | NCRNA00189  | non-protein coding RNA 189                                       | 1.5                        | 193629         | ---        | 3.85E-03 | 7.13E-01              |
| 1561155_at   | W76548                   | ---         | ---                                                              | 1.5                        | ---            | Hs.660202  | 3.91E-03 | 7.13E-01              |
| 1562935_at   | BC036619                 | ---         | ---                                                              | 1.5                        | ---            | Hs.621231  | 4.61E-03 | 7.13E-01              |

|              |           |           |                                                            |     |        |           |          |          |
|--------------|-----------|-----------|------------------------------------------------------------|-----|--------|-----------|----------|----------|
| 203662_s_at  | NM_003275 | TMOD1     | tropomodulin 1                                             | 1.5 | 7111   | Hs.494595 | 3.61E-03 | 7.12E-01 |
| 214446_at    | NM_012081 | ELL2      | elongation factor, RNA polymerase II, 2                    | 1.5 | 22936  | Hs.192221 | 1.28E-03 | 6.96E-01 |
| 216158_at    | AK024123  | ---       | ---                                                        | 1.5 | ---    | Hs.612661 | 3.81E-03 | 7.13E-01 |
| 217021_at    | AL353132  | CYB5A     | cytochrome b5 type A (microsomal)                          | 1.5 | 1528   | Hs.465413 | 4.70E-03 | 7.13E-01 |
| 233793_at    | AU145390  | ---       | ---                                                        | 1.5 | ---    | Hs.677056 | 3.05E-03 | 7.12E-01 |
| 234219_at    | AK024998  | ---       | ---                                                        | 1.5 | ---    | Hs.587370 | 3.40E-03 | 7.12E-01 |
| 242279_at    | R11494    | ---       | ---                                                        | 1.5 | ---    | ---       | 9.40E-04 | 6.80E-01 |
| 244205_at    | AA699919  | ALAS2     | aminolevulinic acid, delta-, synthase 2                    | 1.5 | 212    | Hs.522666 | 1.33E-04 | 5.38E-01 |
| 1554919_s_at | BC036351  | C7orf63   | chromosome 7 open reading frame 63                         | 1.4 | 79846  | Hs.657403 | 3.18E-03 | 7.12E-01 |
| 1562428_at   | AK095331  | LOC654780 | SFPQ                                                       | 1.4 | 654780 | Hs.614079 | 4.87E-03 | 7.13E-01 |
| 1562456_at   | AL050029  | ---       | ---                                                        | 1.4 | ---    | Hs.547926 | 2.79E-03 | 7.12E-01 |
| 1562625_at   | BC040987  | FRYL      | FRY-like                                                   | 1.4 | 285527 | Hs.631525 | 1.06E-03 | 6.80E-01 |
| 1563458_at   | AL832682  | PARVA     | parvin, alpha                                              | 1.4 | 55742  | Hs.607144 | 2.84E-03 | 7.12E-01 |
| 201053_s_at  | NM_006814 | PSMF1     | proteasome (prosome, macropain) inhibitor subunit 1 (PI31) | 1.4 | 9491   | Hs.471917 | 3.06E-03 | 7.12E-01 |
| 202468_s_at  | NM_003798 | CTNNAL1   | catenin (cadherin-associated protein), alpha-like 1        | 1.4 | 8727   | Hs.58488  | 3.67E-03 | 7.12E-01 |
| 205944_s_at  | NM_007098 | CLTCL1    | clathrin, heavy chain-like 1                               | 1.4 | 8218   | Hs.368266 | 6.89E-04 | 6.70E-01 |
| 211466_at    | U70862    | NFIB      | nuclear factor I/B                                         | 1.4 | 4781   | Hs.644095 | 4.25E-04 | 6.22E-01 |
| 215443_at    | BE740743  | TSHR      | thyroid stimulating hormone receptor                       | 1.4 | 7253   | Hs.160411 | 1.77E-03 | 6.96E-01 |
| 217613_at    | AW173720  | TMEM144   | transmembrane protein 144                                  | 1.4 | 55314  | Hs.718582 | 4.51E-03 | 7.13E-01 |
| 219651_at    | NM_018189 | DPPA4     | developmental pluripotency associated 4                    | 1.4 | 55211  | Hs.317659 | 4.92E-03 | 7.13E-01 |
| 224898_at    | BG177759  | WDR26     | WD repeat domain 26                                        | 1.4 | 80232  | Hs.497873 | 9.30E-04 | 6.80E-01 |
| 231963_at    | BG111938  | ---       | ---                                                        | 1.4 | ---    | Hs.26039  | 3.97E-03 | 7.13E-01 |
| 232606_at    | AK021894  | ANK2      | Ankyrin 2, neuronal                                        | 1.4 | 287    | Hs.620557 | 1.92E-03 | 6.96E-01 |
| 233133_at    | AF131772  | ---       | ---                                                        | 1.4 | ---    | Hs.672790 | 3.01E-03 | 7.12E-01 |
| 234653_at    | AK026387  | ---       | ---                                                        | 1.4 | ---    | Hs.306842 | 1.52E-03 | 6.96E-01 |
| 235834_at    | BF063186  | CALD1     | Caldesmon 1                                                | 1.4 | 800    | Hs.490203 | 1.60E-03 | 6.96E-01 |
| 236879_at    | BF114768  | ---       | ---                                                        | 1.4 | ---    | Hs.667883 | 1.34E-03 | 6.96E-01 |
| 236908_at    | BE550429  | ---       | ---                                                        | 1.4 | ---    | Hs.255491 | 3.06E-03 | 7.12E-01 |
| 240903_at    | BF510940  | ---       | ---                                                        | 1.4 | ---    | Hs.666593 | 2.08E-03 | 6.99E-01 |
| 243507_s_at  | AV715251  | C20orf196 | chromosome 20 open reading frame 196                       | 1.4 | 149840 | Hs.529340 | 2.24E-03 | 6.99E-01 |
| 1555001_at   | BC034228  | IQCF1     | IQ motif containing F1                                     | 1.3 | 132141 | Hs.671210 | 5.65E-05 | 4.33E-01 |
| 1562351_at   | AL833331  | ---       | ---                                                        | 1.3 | ---    | Hs.662563 | 2.01E-03 | 6.99E-01 |
| 1570061_at   | BC014200  | ---       | ---                                                        | 1.3 | ---    | Hs.684374 | 1.54E-03 | 6.96E-01 |
| 1570470_at   | BC016315  | CATSPERB  | cation channel, sperm-associated, beta                     | 1.3 | 79820  | Hs.131755 | 3.04E-04 | 6.22E-01 |
| 202492_at    | NM_024085 | ATG9A     | ATG9 autophagy related 9 homolog A (S. cerevisiae)         | 1.3 | 79065  | Hs.323363 | 1.20E-03 | 6.96E-01 |
| 203127_s_at  | BC005123  | SPTLC2    | serine palmitoyltransferase, long chain base subunit 2     | 1.3 | 9517   | Hs.435661 | 3.53E-03 | 7.12E-01 |

|              |           |           |                                                                                                     |     |        |           |          |          |
|--------------|-----------|-----------|-----------------------------------------------------------------------------------------------------|-----|--------|-----------|----------|----------|
| 203256_at    | NM_001793 | CDH3      | cadherin 3, type 1, P-cadherin (placental)                                                          | 1.3 | 1001   | Hs.191842 | 4.79E-04 | 6.22E-01 |
| 205505_at    | NM_001490 | GCNT1     | glucosaminyl (N-acetyl) transferase 1, core 2 (beta-1,6-N-acetylglucosaminyl transferase 1, core 2) | 1.3 | 2650   | Hs.521568 | 2.17E-03 | 6.99E-01 |
| 205632_s_at  | NM_003558 | PIP5K1B   | phosphatidylinositol-4-phosphate 5-kinase, type I, beta                                             | 1.3 | 8395   | Hs.534371 | 1.65E-03 | 6.96E-01 |
| 209589_s_at  | AF025304  | EPHB2     | EPH receptor B2                                                                                     | 1.3 | 2048   | Hs.523329 | 2.79E-03 | 7.12E-01 |
| 215754_at    | AU148040  | SCARB2    | scavenger receptor class B, member 2                                                                | 1.3 | 950    | Hs.349656 | 1.59E-03 | 6.96E-01 |
| 216484_x_at  | L24521    | HDGF      | Hepatoma-derived growth factor (high-mobility group protein 1-like)                                 | 1.3 | 3068   | Hs.506748 | 4.72E-03 | 7.13E-01 |
| 216752_at    | AK025026  | PIK3R4    | Phosphoinositide-3-kinase, regulatory subunit 4                                                     | 1.3 | 30849  | Hs.149032 | 3.28E-03 | 7.12E-01 |
| 217736_s_at  | NM_014413 | EIF2AK1   | eukaryotic translation initiation factor 2-alpha kinase 1                                           | 1.3 | 27102  | Hs.719136 | 4.85E-03 | 7.13E-01 |
| 217908_s_at  | NM_018442 | DCAF6     | DDB1 and CUL4 associated factor 6                                                                   | 1.3 | 55827  | Hs.435741 | 4.35E-03 | 7.13E-01 |
| 218673_s_at  | NM_006395 | ATG7      | ATG7 autophagy related 7 homolog (S. cerevisiae)                                                    | 1.3 | 10533  | Hs.716466 | 2.97E-03 | 7.12E-01 |
| 220058_at    | NM_024052 | C17orf39  | chromosome 17 open reading frame 39                                                                 | 1.3 | 79018  | Hs.187422 | 2.64E-03 | 7.12E-01 |
| 221845_s_at  | AI655698  | CLPB      | ClpB caseinolytic peptidase B homolog (E. coli)                                                     | 1.3 | 81570  | Hs.523877 | 2.89E-03 | 7.12E-01 |
| 222298_at    | AA129909  | ---       | ---                                                                                                 | 1.3 | ---    | Hs.648871 | 2.12E-03 | 6.99E-01 |
| 224818_at    | BE622952  | SORT1     | sortilin 1                                                                                          | 1.3 | 6272   | Hs.485195 | 2.23E-03 | 6.99E-01 |
| 227277_at    | BG530089  | MTDH      | metadherin                                                                                          | 1.3 | 92140  | Hs.377155 | 5.36E-04 | 6.22E-01 |
| 227976_at    | AW242009  | LOC644538 | hypothetical protein LOC644538                                                                      | 1.3 | 644538 | Hs.42239  | 4.31E-03 | 7.13E-01 |
| 233279_at    | AU147910  | ---       | ---                                                                                                 | 1.3 | ---    | Hs.677102 | 3.03E-03 | 7.12E-01 |
| 234078_at    | AU147035  | LOC730057 | Hypothetical LOC730057                                                                              | 1.3 | 730057 | Hs.660881 | 3.55E-03 | 7.12E-01 |
| 239887_at    | AW044646  | ---       | ---                                                                                                 | 1.3 | ---    | Hs.662688 | 3.21E-03 | 7.12E-01 |
| 240555_at    | N33393    | ---       | ---                                                                                                 | 1.3 | ---    | ---       | 1.04E-03 | 6.80E-01 |
| 241019_at    | AW445213  | ---       | ---                                                                                                 | 1.3 | ---    | Hs.674505 | 4.96E-03 | 7.13E-01 |
| 241287_x_at  | R07343    | ---       | ---                                                                                                 | 1.3 | ---    | ---       | 3.07E-03 | 7.12E-01 |
| 241818_at    | AA604777  | ---       | ---                                                                                                 | 1.3 | ---    | Hs.657310 | 3.84E-03 | 7.13E-01 |
| 241837_at    | AI289774  | ---       | ---                                                                                                 | 1.3 | ---    | ---       | 4.73E-03 | 7.13E-01 |
| 242788_at    | AI467798  | KDM4D     | lysine (K)-specific demethylase 4D                                                                  | 1.3 | 55693  | Hs.503598 | 4.95E-03 | 7.13E-01 |
| 242831_at    | AW293235  | ---       | ---                                                                                                 | 1.3 | ---    | Hs.609538 | 2.26E-03 | 6.99E-01 |
| 243756_at    | AI057226  | ---       | ---                                                                                                 | 1.3 | ---    | ---       | 3.67E-03 | 7.12E-01 |
| 244891_x_at  | AA922496  | ---       | ---                                                                                                 | 1.3 | ---    | Hs.666672 | 1.09E-03 | 6.80E-01 |
| 1557352_at   | BU754109  | SQLE      | squalene epoxidase                                                                                  | 1.2 | 6713   | Hs.71465  | 3.37E-04 | 6.22E-01 |
| 1560397_s_at | AK097976  | KLHL6     | kelch-like 6 (Drosophila)                                                                           | 1.2 | 89857  | Hs.659147 | 4.76E-04 | 6.22E-01 |
| 1562086_at   | BC035117  | ---       | ---                                                                                                 | 1.2 | ---    | Hs.385587 | 3.70E-03 | 7.12E-01 |
| 1568974_at   | BC025319  | NHEG1     | neuroblastoma highly expressed 1                                                                    | 1.2 | 1E+08  | ---       | 1.07E-03 | 6.80E-01 |
| 200649_at    | BC002356  | NUCB1     | nucleobindin 1                                                                                      | 1.2 | 4924   | Hs.631602 | 1.78E-03 | 6.96E-01 |
| 218540_at    | NM_024328 | THTPA     | thiamine triphosphatase                                                                             | 1.2 | 79178  | Hs.655179 | 4.65E-03 | 7.13E-01 |
| 222304_x_at  | AW514038  | OR7E47P   | olfactory receptor, family 7, subfamily E, member 47 pseudogen                                      | 1.2 | 26628  | Hs.524431 | 4.32E-04 | 6.22E-01 |
| 228194_s_at  | AI675836  | SORCS1    | sortilin-related VPS10 domain containing receptor 1                                                 | 1.2 | 114815 | Hs.591915 | 1.36E-03 | 6.96E-01 |

|              |           |           |                                                                                                   |      |        |           |          |          |
|--------------|-----------|-----------|---------------------------------------------------------------------------------------------------|------|--------|-----------|----------|----------|
| 228813_at    | AW206037  | HDAC4     | histone deacetylase 4                                                                             | 1.2  | 9759   | Hs.20516  | 7.73E-04 | 6.80E-01 |
| 231049_at    | AI052253  | LMO2      | LIM domain only 2 (rhombotin-like 1)                                                              | 1.2  | 4005   | Hs.34560  | 2.46E-03 | 7.11E-01 |
| 232833_at    | AF070565  | ---       | ---                                                                                               | 1.2  | ---    | Hs.567162 | 3.36E-03 | 7.12E-01 |
| 241643_at    | AW974997  | TLK1      | Tousled-like kinase 1                                                                             | 1.2  | 9874   | Hs.719163 | 3.01E-03 | 7.12E-01 |
| 241883_x_at  | R54203    | ---       | ---                                                                                               | 1.2  | ---    | ---       | 4.71E-03 | 7.13E-01 |
| 1552882_a_at | NM_152424 | FAM123B   | family with sequence similarity 123B                                                              | -1.2 | 139285 | Hs.314225 | 3.17E-04 | 6.22E-01 |
| 1558277_at   | BM786513  | ZNF740    | zinc finger protein 740                                                                           | -1.2 | 283337 | Hs.524458 | 2.11E-03 | 6.99E-01 |
| 1560432_at   | AF388367  | CLRN1OS   | clarin 1 opposite strand                                                                          | -1.2 | 116933 | Hs.570680 | 1.54E-04 | 5.38E-01 |
| 1567358_at   | AJ488204  | NAV2      | neuron navigator 2                                                                                | -1.2 | 89797  | Hs.639427 | 2.07E-03 | 6.99E-01 |
| 203378_at    | AB020631  | PCF11     | PCF11, cleavage and polyadenylation factor subunit, homolog (S. cerevisiae)                       | -1.2 | 51585  | Hs.128959 | 1.29E-04 | 5.38E-01 |
| 203540_at    | NM_002055 | GFAP      | glial fibrillary acidic protein                                                                   | -1.2 | 2670   | Hs.514227 | 2.19E-03 | 6.99E-01 |
| 203992_s_at  | AF000992  | KDM6A     | lysine (K)-specific demethylase 6A                                                                | -1.2 | 7403   | Hs.522616 | 3.51E-03 | 7.12E-01 |
| 205062_x_at  | NM_002892 | ARID4A    | AT rich interactive domain 4A (RBP1-like)                                                         | -1.2 | 5926   | Hs.161000 | 3.60E-03 | 7.12E-01 |
| 205198_s_at  | NM_000052 | ATP7A     | ATPase, Cu <sup>++</sup> transporting, alpha polypeptide                                          | -1.2 | 538    | Hs.496414 | 1.75E-04 | 5.38E-01 |
| 206968_s_at  | NM_006165 | NFRKB     | nuclear factor related to kappaB binding protein                                                  | -1.2 | 4798   | Hs.530539 | 1.05E-03 | 6.80E-01 |
| 207391_s_at  | NM_003557 | PIP5K1A   | phosphatidylinositol-4-phosphate 5-kinase, type I, alpha                                          | -1.2 | 8394   | Hs.655131 | 2.54E-03 | 7.11E-01 |
| 207463_x_at  | NM_002771 | PRSS3     | protease, serine, 3                                                                               | -1.2 | 5646   | Hs.654513 | 4.96E-03 | 7.13E-01 |
| 211855_s_at  | AF155810  | SLC25A14  | solute carrier family 25 (mitochondrial carrier, brain), member 14                                | -1.2 | 9016   | Hs.194686 | 2.52E-03 | 7.11E-01 |
| 212030_at    | BG251218  | RBM25     | RNA binding motif protein 25                                                                      | -1.2 | 58517  | Hs.531106 | 3.11E-03 | 7.12E-01 |
| 213777_s_at  | AI762013  | ---       | ---                                                                                               | -1.2 | ---    | ---       | 2.87E-03 | 7.12E-01 |
| 214206_at    | AI739480  | PPIL6     | peptidylprolyl isomerase (cyclophilin)-like 6                                                     | -1.2 | 285755 | Hs.32234  | 4.25E-03 | 7.13E-01 |
| 215860_at    | AU158606  | SYT12     | Synaptotagmin XII                                                                                 | -1.2 | 91683  | Hs.287636 | 4.41E-03 | 7.13E-01 |
| 218172_s_at  | NM_018630 | DERL1     | Der1-like domain family, member 1                                                                 | -1.2 | 79139  | Hs.241576 | 2.61E-04 | 6.05E-01 |
| 218218_at    | NM_018171 | APPL2     | adaptor protein, phosphotyrosine interaction, PH domain and leucine-rich repeat domain containing | -1.2 | 55198  | Hs.506603 | 1.96E-03 | 6.96E-01 |
| 218399_s_at  | NM_017955 | CDCA4     | cell division cycle associated 4                                                                  | -1.2 | 55038  | Hs.715701 | 1.39E-03 | 6.96E-01 |
| 218733_at    | NM_018133 | MSL2      | male-specific lethal 2 homolog (Drosophila)                                                       | -1.2 | 55167  | Hs.18631  | 1.85E-03 | 6.96E-01 |
| 221244_s_at  | NM_031268 | PDPK1     | 3-phosphoinositide dependent protein kinase-1                                                     | -1.2 | 5170   | Hs.459691 | 4.94E-03 | 7.13E-01 |
| 222501_s_at  | BE674760  | REPIN1    | replication initiator 1                                                                           | -1.2 | 29803  | Hs.647086 | 1.83E-03 | 6.96E-01 |
| 223450_s_at  | AF332595  | COG3      | component of oligomeric golgi complex 3                                                           | -1.2 | 83548  | Hs.507948 | 3.22E-03 | 7.12E-01 |
| 224614_at    | AK024863  | DYNC1LI2  | dynein, cytoplasmic 1, light intermediate chain 2                                                 | -1.2 | 1783   | Hs.369068 | 1.92E-03 | 6.96E-01 |
| 225070_at    | BF112132  | NUS1      | nuclear undecaprenyl pyrophosphate synthase 1 homolog (S. cerevisiae)                             | -1.2 | 116150 | Hs.289008 | 1.77E-03 | 6.96E-01 |
| 226115_at    | AI138934  | AHCTF1    | AT hook containing transcription factor 1                                                         | -1.2 | 25909  | Hs.300887 | 3.84E-03 | 7.13E-01 |
| 226755_at    | AI375939  | LOC642587 | NPC-A-5                                                                                           | -1.2 | 642587 | Hs.510543 | 9.02E-04 | 6.80E-01 |
| 227205_at    | AW575233  | TAF1      | TAF1 RNA polymerase II, TATA box binding protein (TBP)-associated factor 1                        | -1.2 | 6872   | Hs.158560 | 1.02E-03 | 6.80E-01 |
| 227837_at    | BF057711  | LOC729570 | hypothetical LOC729570                                                                            | -1.2 | 729570 | Hs.662622 | 3.41E-03 | 7.12E-01 |
| 232311_at    | AU147899  | B2M       | Beta-2-microglobulin                                                                              | -1.2 | 567    | Hs.709313 | 4.23E-03 | 7.13E-01 |

|              |           |             |                                                                    |      |          |           |          |          |
|--------------|-----------|-------------|--------------------------------------------------------------------|------|----------|-----------|----------|----------|
| 232435_at    | U00944    | ---         | ---                                                                | -1.2 | ---      | Hs.661646 | 2.19E-05 | 4.33E-01 |
| 235281_x_at  | AA523289  | AHNAK       | AHNAK nucleoprotein                                                | -1.2 | 79026    | Hs.502756 | 2.21E-04 | 5.75E-01 |
| 235633_at    | AW361634  | ---         | ---                                                                | -1.2 | ---      | Hs.670510 | 4.76E-03 | 7.13E-01 |
| 235819_at    | AI291128  | ---         | ---                                                                | -1.2 | ---      | Hs.643652 | 1.95E-03 | 6.96E-01 |
| 236053_at    | AW873329  | LOC10012865 | hypothetical LOC100128653                                          | -1.2 | 1E+08    | Hs.656985 | 2.26E-03 | 6.99E-01 |
| 240784_at    | BE549627  | C7orf52     | chromosome 7 open reading frame 52                                 | -1.2 | 375607   | Hs.213044 | 2.76E-03 | 7.12E-01 |
| 240930_at    | R92115    | CRAMP1L     | Crm, cramped-like (Drosophila)                                     | -1.2 | 57585    | Hs.603676 | 3.70E-03 | 7.12E-01 |
| 241983_at    | AV649337  | PTPN2       | Protein tyrosine phosphatase, non-receptor type 2                  | -1.2 | 5771     | Hs.654527 | 2.78E-03 | 7.12E-01 |
| 243133_at    | AW135965  | TSC22D1     | TSC22 domain family, member 1                                      | -1.2 | 8848     | Hs.507916 | 6.99E-04 | 6.70E-01 |
| 243314_at    | W90446    | ---         | ---                                                                | -1.2 | ---      | Hs.687920 | 1.11E-03 | 6.80E-01 |
| 244141_at    | AA935795  | ---         | ---                                                                | -1.2 | ---      | Hs.480975 | 5.47E-04 | 6.22E-01 |
| 1554287_at   | BC011763  | TRIM4       | tripartite motif-containing 4                                      | -1.3 | 89122    | Hs.50749  | 3.57E-03 | 7.12E-01 |
| 1555225_at   | BC008306  | C1orf43     | chromosome 1 open reading frame 43                                 | -1.3 | 25912    | Hs.287471 | 3.39E-03 | 7.12E-01 |
| 1555967_at   | AA362254  | ---         | ---                                                                | -1.3 | ---      | Hs.21423  | 4.99E-03 | 7.13E-01 |
| 1558975_at   | BC040160  | FAM100A     | family with sequence similarity 100, member A                      | -1.3 | 124402   | Hs.513313 | 1.89E-03 | 6.96E-01 |
| 1560306_at   | AF086010  | ---         | ---                                                                | -1.3 | ---      | Hs.659026 | 4.42E-03 | 7.13E-01 |
| 1560819_a_at | AI138766  | LOC387895   | Hypothetical gene supported by BC040060                            | -1.3 | 387895   | Hs.534660 | 4.66E-03 | 7.13E-01 |
| 1562845_at   | AK097720  | EP400NL     | EP400 N-terminal like                                              | -1.3 | 347918   | Hs.122115 | 1.97E-04 | 5.38E-01 |
| 1564308_a_at | AK057360  | MPP7        | membrane protein, palmitoylated 7 (MAGUK p55 subfamily mem         | -1.3 | 143098   | Hs.499159 | 2.14E-03 | 6.99E-01 |
| 1564460_at   | AK093678  | LOC286442   | hypothetical protein LOC286442                                     | -1.3 | 286442   | Hs.638478 | 1.75E-03 | 6.96E-01 |
| 1565784_at   | AK094115  | LOC10012826 | hypothetical LOC100128262                                          | -1.3 | 1E+08    | Hs.605240 | 2.44E-03 | 7.11E-01 |
| 1569102_at   | U66691    | ABCA4       | ATP-binding cassette, sub-family A (ABC1), member 4                | -1.3 | 24       | Hs.416707 | 3.67E-03 | 7.12E-01 |
| 1570371_a_at | BC015430  | SELI        | Selenoprotein I                                                    | -1.3 | 85465    | Hs.189073 | 3.92E-03 | 7.13E-01 |
| 202247_s_at  | BE561596  | MTA1        | metastasis associated 1                                            | -1.3 | 9112     | Hs.525629 | 3.43E-03 | 7.12E-01 |
| 204108_at    | AL031778  | NFYA        | nuclear transcription factor Y, alpha                              | -1.3 | 4800     | Hs.10441  | 3.13E-03 | 7.12E-01 |
| 205578_at    | NM_004560 | ROR2        | receptor tyrosine kinase-like orphan receptor 2                    | -1.3 | 4920     | Hs.98255  | 1.32E-03 | 6.96E-01 |
| 206235_at    | NM_002312 | LIG4        | ligase IV, DNA, ATP-dependent                                      | -1.3 | 3981     | Hs.166091 | 3.64E-03 | 7.12E-01 |
| 206752_s_at  | NM_004402 | DFFB        | DNA fragmentation factor, 40kDa, beta polypeptide (caspase-ac      | -1.3 | 1677     | Hs.133089 | 8.91E-04 | 6.80E-01 |
| 208566_at    | NM_002244 | LOC10013150 | similar to inward rectifying K+ channel negative regulator Kir2.2v | -1.3 | 10013150 | ---       | 2.09E-03 | 6.99E-01 |
| 211536_x_at  | AB009358  | MAP3K7      | mitogen-activated protein kinase kinase kinase 7                   | -1.3 | 6885     | Hs.719192 | 2.95E-03 | 7.12E-01 |
| 213518_at    | AI689429  | PRKCI       | protein kinase C, iota                                             | -1.3 | 5584     | Hs.478199 | 4.61E-03 | 7.13E-01 |
| 215023_s_at  | AC000064  | PEX1        | peroxisomal biogenesis factor 1                                    | -1.3 | 5189     | Hs.164682 | 1.51E-03 | 6.96E-01 |
| 215186_at    | AL050074  | TBC1D30     | TBC1 domain family, member 30                                      | -1.3 | 23329    | Hs.192492 | 1.17E-03 | 6.96E-01 |
| 217270_s_at  | AC005393  | DYRK1B      | dual-specificity tyrosine-(Y)-phosphorylation regulated kinase 1E  | -1.3 | 9149     | Hs.130988 | 3.63E-04 | 6.22E-01 |
| 218177_at    | AA293502  | CHMP1B      | chromatin modifying protein 1B                                     | -1.3 | 57132    | Hs.656244 | 3.62E-03 | 7.12E-01 |
| 218178_s_at  | NM_020412 | CHMP1B      | chromatin modifying protein 1B                                     | -1.3 | 57132    | Hs.656244 | 1.56E-03 | 6.96E-01 |

|              |           |             |                                                                |      |        |           |          |          |
|--------------|-----------|-------------|----------------------------------------------------------------|------|--------|-----------|----------|----------|
| 219479_at    | NM_024089 | KDELC1      | KDEL (Lys-Asp-Glu-Leu) containing 1                            | -1.3 | 79070  | Hs.408629 | 3.60E-03 | 7.12E-01 |
| 221417_x_at  | NM_030760 | S1PR5       | sphingosine-1-phosphate receptor 5                             | -1.3 | 53637  | Hs.501561 | 3.57E-03 | 7.12E-01 |
| 223940_x_at  | AF132202  | MALAT1      | metastasis associated lung adenocarcinoma transcript 1 (non-pr | -1.3 | 378938 | Hs.642877 | 3.37E-03 | 7.12E-01 |
| 225327_at    | AB037791  | KIAA1370    | KIAA1370                                                       | -1.3 | 56204  | Hs.152385 | 3.49E-05 | 4.33E-01 |
| 225481_at    | AL040051  | FRMD6       | FERM domain containing 6                                       | -1.3 | 122786 | Hs.434914 | 1.48E-03 | 6.96E-01 |
| 225972_at    | AA524005  | TMEM64      | transmembrane protein 64                                       | -1.3 | 169200 | Hs.567759 | 9.71E-04 | 6.80E-01 |
| 227537_s_at  | AW173024  | SP3         | Sp3 transcription factor                                       | -1.3 | 6670   | Hs.531587 | 2.60E-03 | 7.12E-01 |
| 231440_at    | AI970148  | LOC10013192 | Hypothetical protein LOC100131928                              | -1.3 | 1E+08  | Hs.662298 | 2.44E-03 | 7.11E-01 |
| 231521_at    | AA019998  | ---         | ---                                                            | -1.3 | ---    | ---       | 3.38E-03 | 7.12E-01 |
| 231831_at    | AU153267  | COX19       | COX19 cytochrome c oxidase assembly homolog (S. cerevisiae)    | -1.3 | 90639  | Hs.121593 | 3.49E-04 | 6.22E-01 |
| 232072_at    | AK025371  | ---         | ---                                                            | -1.3 | ---    | ---       | 3.50E-03 | 7.12E-01 |
| 232086_at    | AV754090  | ---         | ---                                                            | -1.3 | ---    | Hs.656958 | 2.86E-03 | 7.12E-01 |
| 234742_at    | AL138804  | SIRPG       | signal-regulatory protein gamma                                | -1.3 | 55423  | Hs.590883 | 1.77E-03 | 6.96E-01 |
| 235163_at    | BE311936  | MOBK12A     | MOB1, Mps One Binder kinase activator-like 2A (yeast)          | -1.3 | 126308 | Hs.86912  | 2.99E-03 | 7.12E-01 |
| 235216_at    | BG532121  | ESCO1       | establishment of cohesion 1 homolog 1 (S. cerevisiae)          | -1.3 | 114799 | Hs.464733 | 3.07E-03 | 7.12E-01 |
| 235525_at    | BF513712  | ---         | ---                                                            | -1.3 | ---    | Hs.668675 | 2.43E-03 | 7.11E-01 |
| 235711_at    | AA495775  | PURB        | purine-rich element binding protein B                          | -1.3 | 5814   | Hs.349150 | 1.21E-03 | 6.96E-01 |
| 236190_at    | BF516337  | ---         | ---                                                            | -1.3 | ---    | Hs.610023 | 2.82E-03 | 7.12E-01 |
| 236744_at    | BE502037  | PHPT1       | phosphohistidine phosphatase 1                                 | -1.3 | 29085  | Hs.409834 | 1.74E-03 | 6.96E-01 |
| 237440_at    | N39590    | ---         | ---                                                            | -1.3 | ---    | Hs.659294 | 4.34E-03 | 7.13E-01 |
| 238676_at    | BE856007  | ---         | ---                                                            | -1.3 | ---    | Hs.659449 | 1.87E-03 | 6.96E-01 |
| 238987_at    | AL574435  | B4GALT1     | UDP-Gal:betaGlcNAc beta 1,4- galactosyltransferase, polypeptid | -1.3 | 2683   | Hs.272011 | 3.68E-03 | 7.12E-01 |
| 238991_at    | BF439256  | LOC10028701 | hypothetical protein LOC100287019                              | -1.3 | 1E+08  | ---       | 1.53E-04 | 5.38E-01 |
| 240892_at    | AI939452  | ---         | ---                                                            | -1.3 | ---    | Hs.619103 | 4.27E-03 | 7.13E-01 |
| 241619_at    | BF526558  | CALM1       | calmodulin 1 (phosphorylase kinase, delta)                     | -1.3 | 801    | Hs.282410 | 2.39E-03 | 7.11E-01 |
| 241802_x_at  | R44770    | GRM2        | glutamate receptor, metabotropic 2                             | -1.3 | 2912   | Hs.121510 | 3.66E-03 | 7.12E-01 |
| 241856_at    | AA063037  | ---         | ---                                                            | -1.3 | ---    | Hs.209249 | 2.54E-03 | 7.11E-01 |
| 241972_at    | AA507555  | LOC401588   | hypothetical LOC401588                                         | -1.3 | 401588 | ---       | 3.99E-04 | 6.22E-01 |
| 242822_at    | AI125859  | MGC39584    | Hypothetical gene supported by BC029568                        | -1.3 | 441058 | Hs.130535 | 9.49E-04 | 6.80E-01 |
| 243806_at    | AW015140  | ---         | ---                                                            | -1.3 | ---    | Hs.598790 | 8.00E-04 | 6.80E-01 |
| 243951_at    | AA887211  | ABCB1       | ATP-binding cassette, sub-family B (MDR/TAP), member 1         | -1.3 | 5243   | Hs.489033 | 3.91E-03 | 7.13E-01 |
| 244322_at    | AW362008  | hCG_2038586 | hypothetical LOC646329                                         | -1.3 | 646329 | ---       | 4.46E-03 | 7.13E-01 |
| 1553730_x_at | NM_152759 | LRRRC43     | leucine rich repeat containing 43                              | -1.4 | 254050 | Hs.374856 | 3.94E-04 | 6.22E-01 |
| 1555962_at   | CA503291  | B3GNT7      | UDP-GlcNAc:betaGal beta-1,3-N-acetylglucosaminyltransferase    | -1.4 | 93010  | Hs.299329 | 3.28E-03 | 7.12E-01 |
| 1555963_x_at | CA503291  | B3GNT7      | UDP-GlcNAc:betaGal beta-1,3-N-acetylglucosaminyltransferase    | -1.4 | 93010  | Hs.299329 | 4.91E-03 | 7.13E-01 |
| 1556662_at   | BC039392  | ---         | ---                                                            | -1.4 | ---    | Hs.658541 | 4.12E-03 | 7.13E-01 |

|              |           |           |                                                                 |      |        |           |          |          |
|--------------|-----------|-----------|-----------------------------------------------------------------|------|--------|-----------|----------|----------|
| 1559021_at   | BC041355  | ---       | ---                                                             | -1.4 | ---    | ---       | 1.10E-03 | 6.80E-01 |
| 1563860_at   | AK098018  | LOC400965 | hypothetical LOC400965                                          | -1.4 | 400965 | Hs.646791 | 4.64E-03 | 7.13E-01 |
| 1564002_a_at | AK092103  | AKD1      | adenylate kinase domain containing 1                            | -1.4 | 221264 | Hs.486169 | 2.15E-03 | 6.99E-01 |
| 205616_at    | AW134812  | KCNA6     | potassium voltage-gated channel, shaker-related subfamily, mer  | -1.4 | 3742   | Hs.306190 | 3.47E-03 | 7.12E-01 |
| 206543_at    | NM_003070 | SMARCA2   | SWI/SNF related, matrix associated, actin dependent regulator c | -1.4 | 6595   | Hs.298990 | 3.66E-03 | 7.12E-01 |
| 207538_at    | NM_000589 | IL4       | interleukin 4                                                   | -1.4 | 3565   | Hs.73917  | 4.27E-03 | 7.13E-01 |
| 220055_at    | NM_020653 | ZNF287    | zinc finger protein 287                                         | -1.4 | 57336  | Hs.99724  | 1.82E-04 | 5.38E-01 |
| 221685_s_at  | AF269167  | CCDC99    | coiled-coil domain containing 99                                | -1.4 | 54908  | Hs.368710 | 4.01E-03 | 7.13E-01 |
| 225700_at    | AC006042  | GLCCI1    | glucocorticoid induced transcript 1                             | -1.4 | 113263 | Hs.131673 | 2.13E-03 | 6.99E-01 |
| 226609_at    | N22751    | DCBLD1    | discoidin, CUB and LCCL domain containing 1                     | -1.4 | 285761 | Hs.658304 | 2.22E-03 | 6.99E-01 |
| 238188_at    | AI989571  | ---       | ---                                                             | -1.4 | ---    | ---       | 4.23E-03 | 7.13E-01 |
| 240190_at    | AI190292  | ---       | ---                                                             | -1.4 | ---    | Hs.127462 | 1.65E-03 | 6.96E-01 |
| 242565_x_at  | AI146751  | C21orf57  | Chromosome 21 open reading frame 57                             | -1.4 | 54059  | Hs.474066 | 1.96E-03 | 6.96E-01 |
| 1558368_s_at | AK075558  | C1orf187  | chromosome 1 open reading frame 187                             | -1.5 | 374946 | ---       | 3.37E-03 | 7.12E-01 |
| 1566323_at   | AA442149  | MAF       | V-maf musculoaponeurotic fibrosarcoma oncogene homolog (av      | -1.5 | 4094   | Hs.134859 | 1.04E-03 | 6.80E-01 |
| 209993_at    | AF016535  | ABCB1     | ATP-binding cassette, sub-family B (MDR/TAP), member 1          | -1.5 | 5243   | Hs.489033 | 2.73E-03 | 7.12E-01 |
| 220657_at    | NM_018143 | KLHL11    | kelch-like 11 (Drosophila)                                      | -1.5 | 55175  | Hs.592134 | 3.10E-04 | 6.22E-01 |
| 225842_at    | AK026181  | PHLDA1    | pleckstrin homology-like domain, family A, member 1             | -1.5 | 22822  | Hs.602085 | 6.33E-05 | 4.33E-01 |
| 226751_at    | AW193693  | CNRIP1    | cannabinoid receptor interacting protein 1                      | -1.5 | 25927  | Hs.212885 | 4.18E-03 | 7.13E-01 |
| 230846_at    | R43202    | AKAP5     | A kinase (PRKA) anchor protein 5                                | -1.5 | 9495   | Hs.656683 | 5.44E-04 | 6.22E-01 |
| 232686_at    | AI801574  | SIGLECP3  | sialic acid binding Ig-like lectin, pseudogene 3                | -1.5 | 284367 | Hs.132045 | 3.22E-03 | 7.12E-01 |
| 236017_at    | AI199453  | CDKL3     | cyclin-dependent kinase-like 3                                  | -1.5 | 51265  | ---       | 2.43E-04 | 6.03E-01 |
| 1555166_a_at | AF533251  | ZNF396    | zinc finger protein 396                                         | -1.6 | 252884 | Hs.351005 | 1.90E-03 | 6.96E-01 |
| 1557658_at   | BE503598  | ---       | ---                                                             | -1.6 | ---    | Hs.281959 | 4.13E-03 | 7.13E-01 |
| 1561015_at   | AF085936  | ---       | ---                                                             | -1.6 | ---    | Hs.684733 | 1.45E-03 | 6.96E-01 |
| 1563335_at   | BC038539  | IRGM      | immunity-related GTPase family, M                               | -1.6 | 345611 | Hs.519680 | 2.84E-03 | 7.12E-01 |
| 239208_s_at  | AW945538  | C21orf57  | Chromosome 21 open reading frame 57                             | -1.6 | 54059  | Hs.474066 | 3.01E-03 | 7.12E-01 |
| 239715_at    | AI374756  | ---       | ---                                                             | -1.6 | ---    | Hs.626022 | 1.83E-04 | 5.38E-01 |
| 1552410_at   | NM_173535 | CLEC4F    | C-type lectin domain family 4, member F                         | -2.7 | 165530 | Hs.681239 | 1.31E-03 | 6.96E-01 |
